# Supplementary material
Source: PubMed Central journal article supplement (PMC2000435)

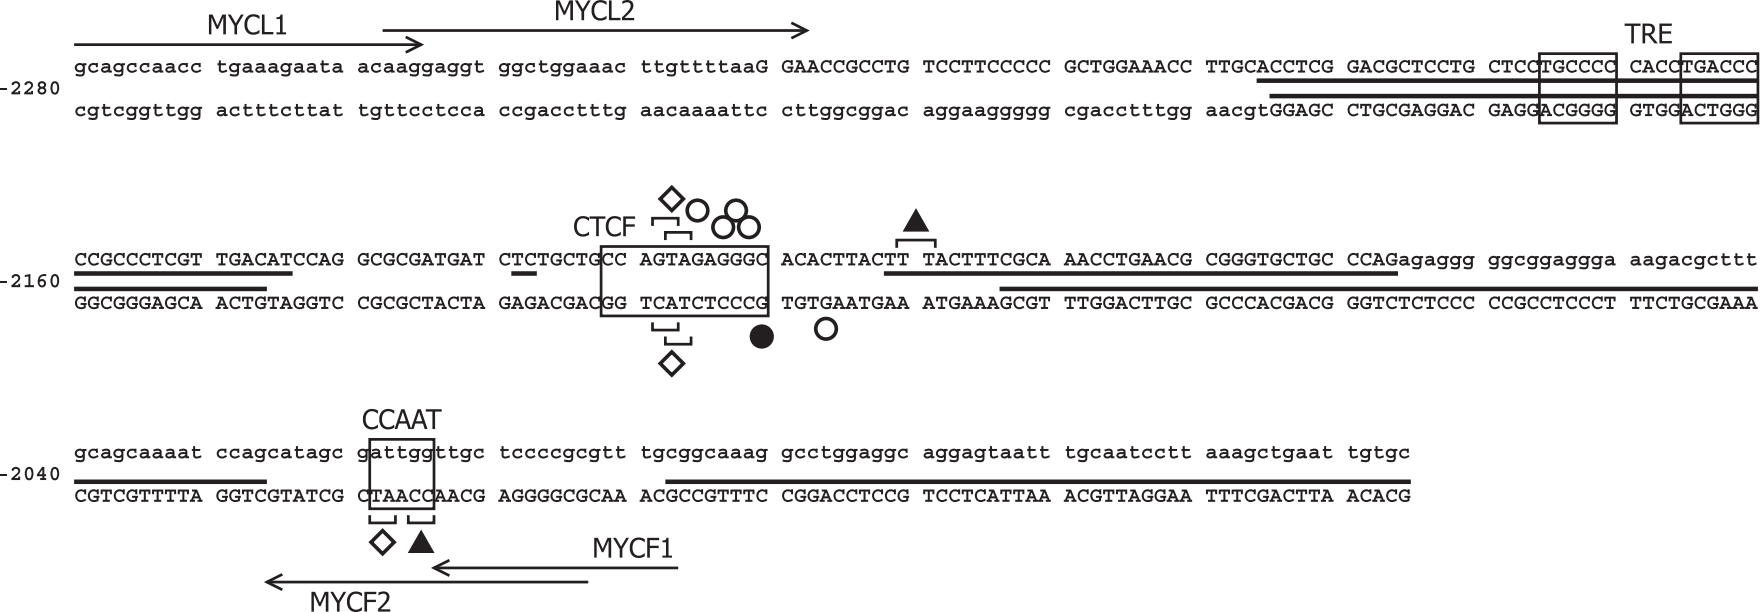

Supplement: pnas_0702363104_1.pdf [file pnas_0702363104_1.pdf]

13245

Repeat

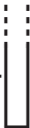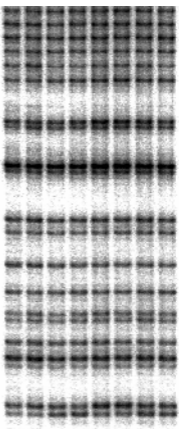

DNA

Asynchronous

Mitotic

Released

Cells

CTCF

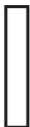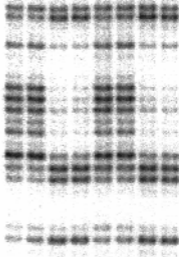

0 00

13128

1 2 3 4 5 6 7 8

Supplement: pnas_0702363104_2.pdf [file pnas_0702363104_2.pdf]

$\lambda$ /HindIII

$\phi$ X174/HaeIII

Asynchronous

Mitotic

23,130 ▶

2,027 ▶

1,353 ▶

603 ▶

310 ▶

72 ▶

(bp)

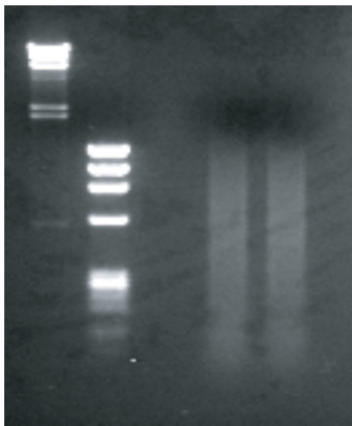

Supplement: pnas_0702363104_3.pdf [file pnas_0702363104_3.pdf]

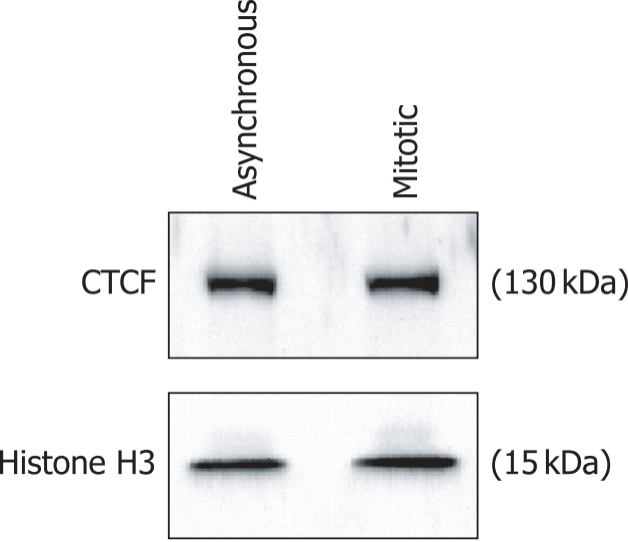

Supplement: pnas_0702363104_4.pdf [file pnas_0702363104_4.pdf]

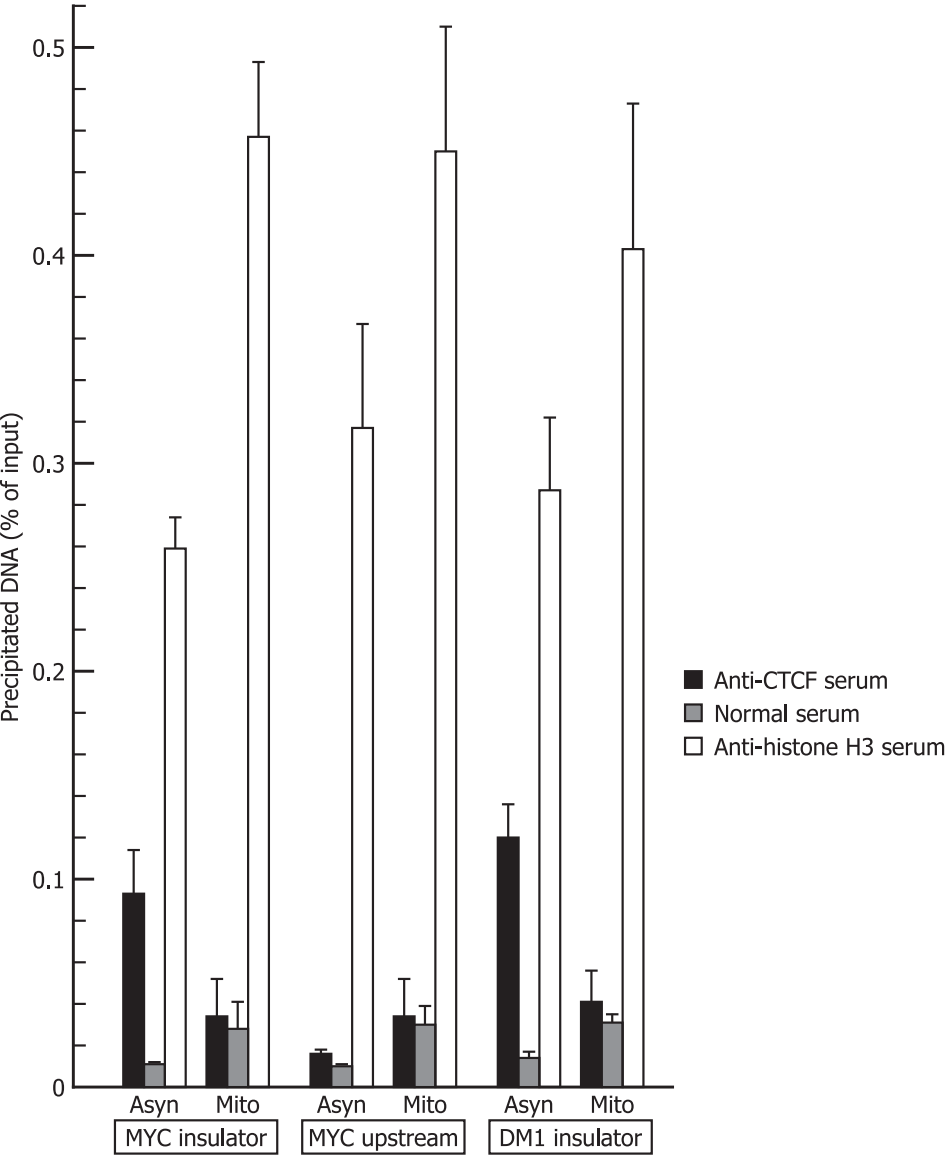

Supplement: pnas_0702363104_5.pdf [file pnas_0702363104_5.pdf]
